# Supplementary material for: Repurposing Synthetic Congeners of a Natural Product Aurone Unveils a Lead Antitumor Agent Inhibiting Folded P-Loop Conformation of MET Receptor Tyrosine Kinase
Source: MDPI journal article supplement (doi:10.3390/ph16111597), 2023-11-13
Supplement: s1 [file s1]

*Supplementary Materials for*

**Repurposing Synthetic Congeners of a Natural Product Aurone Unveils a Lead Antitumor Agent  
Inhibiting Folded P-Loop Conformation of MET Receptor Tyrosine Kinase**

Ahmed H.E. Hassan <sup>1,2,†</sup>, Cai Yi Wang <sup>3,†</sup>, Cheol Jung Lee <sup>4</sup>, Hye Rim Jeon <sup>4</sup>, Yeonwoo Choi <sup>4</sup>,

Suyeon Moon <sup>4</sup>, Chae Hyeon Lee <sup>4</sup>, Yeon Ju Kim <sup>4</sup>, Soo Bin Cho <sup>4</sup>, Kazem Mahmoud <sup>5</sup>, Selwan M. El-Sayed <sup>1</sup>,

Sang Kook Lee <sup>3,\*</sup> and Yong Sup Lee <sup>2,4,\*</sup>

<sup>1</sup> Department of Medicinal Chemistry, Faculty of Pharmacy, Mansoura University, Mansoura 35516, Egypt

<sup>2</sup> Medicinal Chemistry Laboratory, Department of Pharmacy, College of Pharmacy, Kyung Hee University, 26 Kyungheedaero, Seoul 02447, Republic of Korea

<sup>3</sup> Natural Products Research Institute, College of Pharmacy, Seoul National University, Seoul 08826, Republic of Korea

<sup>4</sup> Department of Fundamental Pharmaceutical Sciences, Kyung Hee University, Seoul 02447, Republic of Korea

<sup>5</sup> Department of Pharmaceutical Chemistry, Faculty of Pharmacy, Egyptian Russian University, Badr City, Cairo, 11829, Egypt

\*Correspondence: kyslee@khu.ac.kr (Y.S.L.); sklee61@snu.ac.kr (S.K.L.)

<sup>†</sup> These authors contributed equally to this work.

## 1. Chemistry

### 1.1. Preparation of 6-methoxy-3-coumaranone [1]

Prepared as reported previously [1]. Yield = 58%.

$^1\text{H}$  NMR (400 MHz,  $\text{CDCl}_3$ ):  $\delta$  7.58 (d,  $J$  = 8.0 Hz, 1H), 6.66 (dd,  $J$  = 8.0, 2.0 Hz, 1H), 6.55 (d,  $J$  = 2.0 Hz, 1H), 4.63 (s, 2H), 3.88 (s, 3H,  $\text{OCH}_3$ ).

### 1.2. Preparation of 4-(methoxymethoxy)benzaldehyde [1]

Prepared as reported previously [1]. Yield = 78%.

$^1\text{H}$  NMR (400 MHz,  $\text{CDCl}_3$ )  $\delta$  9.91 (s, 1H), 7.89 (tt,  $J$  = 5.2, 2.6, 1.8 Hz, 2H), 7.22 (tt,  $J$  = 6.8, 2.8, 1.6 Hz, 2H), 5.78 (s, 2H), 3.42 (s, 3H).

### 1.3. Preparation of sulfuretin analogs [1]

Targeted compounds were prepared as reported previously [1] employing acid-catalyzed cross-aldol condensation or base-catalyzed cross-aldol condensation.

#### (*Z*)-6-Hydroxy-2-(2-hydroxybenzylidene)benzofuran-3(2*H*)-one (1a) [2]

Compound **1a** was prepared as reported previously [2] employing acid-catalyzed cross-aldol condensation. Yield = 75%.

$^1\text{H}$  NMR (400 MHz,  $\text{DMSO}-d_6$ ):  $\delta$  11.2 (brs, 1H), 10.3 (brs, 1H), 8.09 (dd,  $J$  = 6.4, 1.4 Hz, 1H), 7.61 (d,  $J$  = 8.5 Hz, 1H), 7.23 (dd,  $J$  = 6.8, 1.5 Hz, 1H), 7.09 (s, 1H), 6.94 (m, 2H), 6.71 (dd,  $J$  = 6.5, 1.8 Hz, 1H);  $^{13}\text{C}$  NMR (100 MHz,  $\text{DMSO}-d_6$ ):  $\delta$  181.8, 186.2, 166.8, 157.6, 147.3, 131.8, 131.4, 126.3, 120.0, 119.3, 116.1, 113.4, 105.1, 99.0.

#### (*Z*)-6-Hydroxy-2-(3-hydroxybenzylidene)benzofuran-3(2*H*)-one (1b)

Compound **1b** was prepared as reported previously [2] employing acid-catalyzed cross-aldol condensation. Yield = 74%.

$^1\text{H}$  NMR (400 MHz,  $\text{DMSO}-d_6$ ):  $\delta$  7.67 (d,  $J$  = 8.4 Hz, 1H), 7.43 (d,  $J$  = 1.82 Hz, 1H), 7.38 (dd,  $J$  = 7.7, 7.3 Hz, 1H), 7.32 (dd,  $J$  = 7.9, 7.8 Hz, 1H), 6.88 (m, 1H), 6.81 (d,  $J$  = 1.8 Hz, 1H), 6.76 (dd,  $J$  = 6.6, 1.9 Hz, 1H), 6.72 (s, 1H);  $^{13}\text{C}$  NMR (100 MHz,  $\text{DMSO}-d_6$ ):  $\delta$  181.9, 168.3, 167.0, 158.0, 147.7, 133.6, 130.6, 126.4, 122.8, 117.7,

117.5, 113.5, 113.2, 11.1, 98.9, 98.2.

**(Z)-6-Hydroxy-2-(4-hydroxybenzylidene)benzofuran-3(2H)-one (1c) [3]**

Compound **1c** was prepared as reported previously [3] employing acid-catalyzed cross-aldol condensation. Yield = 78%.

<sup>1</sup>H NMR (400 MHz, DMSO-*d*<sub>6</sub>):  $\delta$  11.1 (s, 1H), 10.1 (s, 1H), 7.83 (d, *J* = 8.6 Hz, 2H), 7.61 (d, *J* = 8.4 Hz, 1H), 6.90 (d, *J* = 8.6 Hz, 2H), 6.78 (d, *J* = 1.6 Hz, 1H), 6.73 (s, 1H), 6.72 (dd, *J* = 8.4, 1.6 Hz, 1H); <sup>13</sup>C NMR (400 MHz, DMSO-*d*<sub>6</sub>):  $\delta$  181.7, 168.0, 166.6, 159.7, 146.2, 133.7, 126.2, 123.5, 116.5, 113.6, 113.3, 111.9, 99.0

**(Z)-2-(2,4-Dihydroxybenzylidene)-6-hydroxybenzofuran-3(2H)-one (1d) [2]**

Compound **1d** was prepared as reported previously [2] employing base-catalyzed cross-aldol condensation. Yield = 7% yield.

<sup>1</sup>H NMR (400 MHz, MeOD-*d*<sub>4</sub>):  $\delta$  10.26 (brs, 1H), 10.00 (brs, 1H), 7.94 (d, *J* = 9.2 Hz, 1H), 7.57 (d, *J* = 8.4 Hz, 1H), 7.10 (s, 1H), 6.75 (d, *J* = 1.8 Hz, 1H), 6.68 (dd, *J* = 6.4, 1.9 Hz, 1H), 6.38 (m, 2H); <sup>13</sup>C NMR (100 MHz, MeOD-*d*<sub>4</sub>):  $\delta$  180.9, 167.1, 165.8, 160.8, 159.0, 145.0, 132.3, 125.4, 113.3, 112.6, 110.4, 108.2, 105.8, 102.2, 98.4.

**(Z)-2-(2,5-Dihydroxybenzylidene)-6-hydroxybenzofuran-3(2H)-one (1e) [2]**

Compound **1e** was prepared as reported previously [2] employing acid-catalyzed cross-aldol condensation. Yield = 7% yield).

<sup>1</sup>H NMR (400 MHz, MeOD-*d*<sub>4</sub>):  $\delta$  7.68 (s, 1H), 7.63 (d, *J* = 8.0 Hz, 1H), 7.29 (s, 1H), 6.72-6.69 (m, 4H); <sup>13</sup>C NMR (400 MHz, MeOD-*d*<sub>4</sub>):  $\delta$  182.5, 167.8, 166.1, 150.2, 149.1, 146.6, 124.8, 118.8, 118.0, 115.7, 115.1, 112.7, 111.9, 106.0, 97.2.

**(Z)-2-(3,5-Dihydroxybenzylidene)-6-hydroxybenzofuran-3(2H)-one (1f) [1]**

Compound **1f** was prepared as reported previously [1] employing acid-catalyzed cross-aldol condensation. Yield = 7% yield.

<sup>1</sup>H NMR (500 MHz, DMSO-*d*<sub>6</sub>): δ 11.2 (brs, 1H), 9.47 (s, 2H), 7.59 (d, *J* = 8.4 Hz, 1H), 6.78 (d, *J* = 2.0 Hz, 2H), 6.68 (m, 2H), 6.52 (s, 1H), 6.27 (t, *J* = 2.2 Hz, 1H); <sup>13</sup>C NMR (125 MHz, DMSO-*d*<sub>6</sub>): δ 182.0, 168.4, 167.1, 159.1, 147.7, 133.8, 126.6, 113.6, 113.3, 111.6, 109.8, 105.0, 98.9; HRMS calcd for C<sub>15</sub>H<sub>11</sub>O<sub>5</sub> [M+H]<sup>+</sup> 271.0607, found 271.0623.

**(*Z*)-6-Hydroxy-2-(3,4,5-trihydroxybenzylidene)benzofuran-3(2*H*)-one (1g) [1]**

Compound **1g** was prepared as reported previously [1] employing acid-catalyzed cross-aldol condensation. Yield = 72%.

<sup>1</sup>H NMR (400 MHz, DMSO-*d*<sub>6</sub>): δ 11.15 (brs, 1H), 9.18 (brm, 2H), 7.60 (d, *J* = 8.4 Hz, 1H), 6.95 (s, 2H), 6.73-6.69 (m, 2H), 6.54 (s, 1H); <sup>13</sup>C NMR (100 MHz, DMSO-*d*<sub>6</sub>): δ 181.5, 167.8, 166.5, 146.5, 146.1, 136.7, 126.2, 122.6, 113.6, 113.3, 111.3, 98.7.

**(*Z*)-6-Hydroxy-2-(2-methoxybenzylidene)benzofuran-3(2*H*)-one (1h) [1]**

Compound **1h** was prepared as reported previously [1] employing acid-catalyzed cross-aldol condensation. Yield = 78% yield.

<sup>1</sup>H NMR (400 MHz, DMSO-*d*<sub>6</sub>): δ 11.19 (brs, 1H), 8.15 (dd, *J* = 6.3, 1.4 Hz, 1H), 7.62 (d, *J* = 8.4 Hz, 1H), 7.43 (m, 1H), 7.10 (m, 2H), 7.06 (s, 1H), 6.79 (d, *J* = 1.84 Hz, 1H), 6.72 (dd, *J* = 6.5, 1.8 Hz, 1H), 3.89 (s, 3H); <sup>13</sup>C NMR (100 MHz, DMSO-*d*<sub>6</sub>): δ 181.3, 167.8, 166.4, 158.0, 147.3, 131.4, 130.9, 125.9, 120.8, 120.2, 113.0, 112.7, 111.4, 103.6, 98.6, 55.7.

**(*Z*)-6-Hydroxy-2-(3-methoxybenzylidene)benzofuran-3(2*H*)-one (1i) [1]**

Compound **1i** was prepared as reported previously [1] employing acid-catalyzed cross-aldol condensation. Yield = 92% yield.

<sup>1</sup>H NMR (400 MHz, DMSO-*d*<sub>6</sub>): δ 11.16 (brs, 1H), 7.61 (d, *J* = 8.4 Hz, 1H), 7.52 (d, *J* = 7.7 Hz, 1H), 7.47 (d, *J* = 2.1 Hz, 1H), 7.39 (t, *J* = 8.0 Hz, 1H), 6.99 (dd, *J* = 5.6, 2.5, 1.9 Hz, 1H), 6.79 (d, *J* = 1.8 Hz, 1H), 6.74 (s, 1H), 6.71 (dd, *J* = 6.4, 1.9 Hz, 1H), 3.80 (s, 3H); <sup>13</sup>C NMR (100 MHz, DMSO-*d*<sub>6</sub>): δ 181.9, 168.4, 167.1, 159.8, 147.9, 133.7, 130.4, 126.4, 123.9, 116.7, 115.8, 113.6, 113.1, 110.7, 99.1, 55.6.

**(Z)-6-Hydroxy-2-(4-methoxybenzylidene)benzofuran-3(2H)-one (1j) [1]**

Compound **1j** was prepared as reported previously [1] employing acid-catalyzed cross-aldol condensation. Yield = 87% yield.

<sup>1</sup>H NMR (400 MHz, DMSO-*d*<sub>6</sub>): δ 11.17 (brs, 1H), 7.98 (d, *J* = 8.8 Hz, 2H), 7.68 (d, *J* = 8.4 Hz, 1H), 7.12 (d, *J* = 8.8 Hz, 2H), 6.86 (d, *J* = 1.8 Hz, 1H), 6.84 (s, 1H), 6.79 (dd, *J* = 6.5, 1.9 Hz, 1H), 3.89 (s, 3H); <sup>13</sup>C NMR (100 MHz, DMSO-*d*<sub>6</sub>): δ 181.7, 168.1, 166.7, 160.9, 146.6, 133.4, 126.2, 125.0, 115.0, 113.5, 113.3, 111.2, 99.0, 55.7.

**(Z)-2-(2,3-Dimethoxybenzylidene)-6-hydroxybenzofuran-3(2H)-one (1k) [1]**

Compound **1k** was prepared as reported previously [1] employing acid-catalyzed cross-aldol condensation. Yield = 97% yield.

<sup>1</sup>H NMR (400 MHz, DMSO-*d*<sub>6</sub>): δ 11.12 (brs, 1H), 7.80 (dd, *J* = 8.0, 1.6 Hz, 1H), 7.65 (d, *J* = 8.4 Hz, 1H), 7.24 (t, *J* = 8.0 Hz, 1H), 7.17 (dd, *J* = 8.0, 1.6 Hz, 1H), 6.98 (s, 1H), 6.79 (d, *J* = 1.8 Hz, 1H), 6.74 (dd, *J* = 8.4, 1.8 Hz, 1H), 3.86 (s, 3H), 3.83 (s, 3H); <sup>13</sup>C NMR (125 MHz, DMSO-*d*<sub>6</sub>): δ 182.0, 168.5, 167.2, 153.1, 152.7, 148.7, 148.5, 126.6, 125.1, 122.9, 115.1, 113.7, 113.2, 104.2, 99.2, 61.6, 56.3.

**(Z)-2-(2,5-Dimethoxybenzylidene)-6-hydroxybenzofuran-3(2H)-one (1l) [1]**

Compound **1l** was prepared as reported previously [1] employing acid-catalyzed cross-aldol condensation. Yield = 93% yield.

<sup>1</sup>H NMR (400 MHz, DMSO-*d*<sub>6</sub>): δ 11.2 (brs, 1H), 7.70 (d, *J* = 2.4 Hz, 1H), 7.64 (d, *J* = 8.4 Hz, 1H), 7.05-7.02 (m, 3H), 6.82 (d, *J* = 1.8 Hz, 1H), 6.74 (dd, *J* = 8.4, 1.8 Hz, 1H), 3.85 (s, 3H), 3.79 (s, 3H); <sup>13</sup>C NMR (100 MHz, DMSO-*d*<sub>6</sub>): δ 181.9, 168.4, 167.1, 153.6, 153.1, 148.0, 126.5, 121.4, 117.0, 116.7, 113.6, 113.3, 113.0, 104.1, 99.3, 56.7, 56.0.

**(Z)-2-(3,4-Dimethoxybenzylidene)-6-hydroxybenzofuran-3(2H)-one (1m) [1]**

Compound **1m** was prepared as reported previously [1] employing acid-catalyzed cross-aldol condensation. Yield = 50%.

<sup>1</sup>H NMR (400 MHz, DMSO-*d*<sub>6</sub>): δ 11.1 (brs, 1H), 7.62-7.54 (m, 3H), 7.06 (d, *J* = 8.2 Hz, 1H), 6.80 (d, *J* = 15.0

Hz, 1H), 6.77 (s, 1H), 6.71 (d,  $J = 8.3$  Hz, 1H), 3.82 (s, 6H);  $^{13}\text{C}$  NMR (100 MHz, DMSO- $d_6$ ):  $\delta$  181.6, 168.0, 166.7, 150.8, 149.1, 146.6, 126.2, 125.5, 125.2, 114.6, 113.4, 113.0, 112.3, 111.6, 99.0, 55.9 (2C).

**(Z)-2-(3,5-Dimethoxybenzylidene)-6-hydroxybenzofuran-3(2H)-one (1n) [1]**

Compound **1n** was prepared as reported previously [1] employing acid-catalyzed cross-aldol condensation. Yield = 67%.

$^1\text{H}$  NMR (400 MHz, Pyridine- $d_5$ ):  $\delta$  7.82 (d,  $J = 8.4$  Hz, 1H), 7.29 (d,  $J = 2.1$  Hz, 2H), 7.19 (s, 1H), 7.02 (dd,  $J = 5.2, 1.8$  Hz, 1H), 6.93 (dd,  $J = 6.5, 1.8$  Hz, 1H), 6.70 (dd,  $J = 2.1$  Hz, 1H), 3.72 (s, 6H).

**(Z)-6-Hydroxy-2-(2,3,4-trimethoxybenzylidene)benzofuran-3(2H)-one (1o) [1]**

Compound **1o** was prepared as reported previously [1] employing acid-catalyzed cross-aldol condensation. Yield = 95%.

$^1\text{H}$  NMR (500 MHz, DMSO- $d_6$ ):  $\delta$  11.16 (brs, 1H), 7.90 (d,  $J = 8.4$  Hz, 1H), 7.57 (d,  $J = 8.1$  Hz, 1H), 6.96 (d,  $J = 6.9$  Hz, 1H), 6.86 (s, 1H), 6.73 (d,  $J = 1.9$  Hz, 1H), 6.67 (dd,  $J = 8.1, 1.9$  Hz, 1H), 3.84 (s, 6H), 3.74 (s, 3H);  $^{13}\text{C}$  NMR (125 MHz, DMSO- $d_6$ ):  $\delta$  181.6, 168.2, 166.9, 155.7, 153.5, 147.4, 142.2, 126.9, 126.5, 118.8, 113.5 (2C), 109.2, 104.6, 99.1, 62.2, 61.0, 56.6.

**(Z)-6-Hydroxy-2-(4-(methoxymethoxy)benzylidene)benzofuran-3(2H)-one (1p) [1]**

Compound **1p** was prepared as reported previously [1] employing base-catalyzed cross-aldol condensation. Yield = 86%.

$^1\text{H}$  NMR (400 MHz, DMSO- $d_6$ )  $\delta$  11.16 (brs, 1H), 7.92 (d,  $J = 8.8$  Hz, 2H), 7.62 (d,  $J = 8.4$  Hz, 1H), 7.14 (d,  $J = 8.8$  Hz, 2H), 6.79 (d,  $J = 1.8$  Hz, 2H), 6.71 (dd,  $J = 8.4, 1.8$  Hz, 1H), 5.27 (s, 2H), 3.37 (s, 3H);  $^{13}\text{C}$  NMR (125 MHz, DMSO- $d_6$ ):  $\delta$  181.9, 168.3, 166.9, 158.4, 146.9, 133.4, 133.2, 126.4, 126.1, 117.0, 116.3, 113.5, 111.1, 99.1, 98.3, 94.2, 56.3.

**(Z)-2-(2-Hydroxybenzylidene)-6-methoxybenzofuran-3(2H)-one (1q) [1]**

Compound **1q** was prepared as reported previously [1] employing acid-catalyzed cross-aldol condensation. Yield = 76%.

<sup>1</sup>H NMR (400 MHz, DMSO-*d*<sub>6</sub>):  $\delta$  10.4 (s, 1H), 8.15 (dd, *J* = 8.0, 1.2 Hz, 1H), 7.70 (d, *J* = 8.4 Hz, 1H), 7.31 (td, *J* = 8.0, 1.2 Hz, 1H), 7.17 (d, *J* = 2.0 Hz, 1H), 7.16 (s, 1H), 6.98–6.93 (m, 2H), 6.87 (dd, *J* = 8.4, 2.0 Hz, 1H), 3.93 (s, 3H); <sup>13</sup>C NMR (100 MHz, DMSO-*d*<sub>6</sub>):  $\delta$  181.6, 167.8, 167.2, 157.2, 146.8, 131.5, 131.0, 125.4, 119.6, 118.7, 115.8, 114.0, 112.6, 105.2, 97.1, 56.4.

**(*Z*)-2-(3-Hydroxybenzylidene)-6-methoxybenzofuran-3(2*H*)-one (1r) [1]**

Compound **1r** was prepared as reported previously [1] employing acid-catalyzed cross-aldol condensation. Yield = 27%.

<sup>1</sup>H NMR (400 MHz, DMSO-*d*<sub>6</sub>):  $\delta$  9.73 (s, 1H), 7.72 (d, *J* = 8.4 Hz, 1H), 7.41–7.40 (m, 2H) 7.32 (t, *J* = 8.0 Hz, 1H), 7.15 (d, *J* = 2.0, 1H), 6.88–6.86 (m, 2H), 6.76 (s, 1H), 3.94 (s, 3H); <sup>13</sup>C NMR (100 MHz, DMSO-*d*<sub>6</sub>):  $\delta$  182.2, 168.5, 167.9, 158.1, 147.6, 133.5, 130.4, 126.0, 122.9, 118.0, 117.7, 114.3, 113.2, 111.7, 97.6, 56.9.

**(*Z*)-2-(4-Hydroxybenzylidene)-6-methoxybenzofuran-3(2*H*)-one (1s) [1]**

Compound **1s** was prepared as reported previously [1] employing acid-catalyzed cross-aldol condensation. Yield = 39%.

<sup>1</sup>H NMR (400 MHz, DMSO-*d*<sub>6</sub>):  $\delta$  10.2 (brs, 1H), 7.87 (d, *J* = 8.8 Hz, 2H), 7.69 (d, *J* = 8.4 Hz, 1H), 7.16 (d, *J* = 2.0 Hz, 1H), 6.91 (d, *J* = 8.8 Hz, 2H), 6.87 (dd, *J* = 8.4, 2.0 Hz, 1H), 6.80 (s, 1H), 3.93 (s, 3H); <sup>13</sup>C NMR (100 MHz, DMSO-*d*<sub>6</sub>):  $\delta$  181.4, 167.5, 167.0, 159.4, 145.6, 133.4 (2C), 125.2, 122.9, 116.0 (2C), 114.2, 112.4, 112.0, 97.0, 56.3.

**(*Z*)-2-(2,3-Dihydroxybenzylidene)-6-methoxybenzofuran-3(2*H*)-one (1t) [1]**

Compound **1t** was prepared as reported previously [1] employing acid-catalyzed cross-aldol condensation. Yield = 26%.

<sup>1</sup>H NMR (500 MHz, DMSO-*d*<sub>6</sub>):  $\delta$  7.64 (d, *J* = 8.6 Hz, 1H), 7.57 (dd, *J* = 8.0, 1.5 Hz, 1H), 7.14 (s, 1H), 7.11 (d, *J* = 2.2 Hz, 1H), 6.82–6.79 (m, 2H), 6.71 (t, *J* = 7.9 Hz, 1H), 3.88 (s, 3H), 3.12 (s, 1H), 2.49 (s, 1H); <sup>13</sup>C NMR (125 MHz, DMSO-*d*<sub>6</sub>):  $\delta$  182.1, 168.3, 167.7, 147.2, 146.8, 146.1, 125.9, 121.8, 119.9, 119.8, 117.4, 114.6, 113.1, 106.5, 97.7, 40.9; HRMS calcd for C<sub>16</sub>H<sub>13</sub>O<sub>5</sub> [M+H]<sup>+</sup> 285.0763, found 285.0764.

**(Z)-2-(2,4-Dihydroxybenzylidene)-6-methoxybenzofuran-3(2H)-one (1u) [1]**

Compound **1u** was prepared as reported previously [1] employing acid-catalyzed cross-aldol condensation. Yield = 12%.

<sup>1</sup>H NMR (400 MHz, DMSO-*d*<sub>6</sub>):  $\delta$  10.40 (s, 1H), 10.10 (s, 1H), 8.02 (d, *J* = 8.4 Hz, 1H), 7.67 (d, *J* = 8.8 Hz, 1H), 7.14 (d, *J* = 2.4 Hz, 1H), 7.10 (s, 1H), 6.86 (dd, *J* = 8.8, 2.4 Hz, 1H), 6.42–6.38 (m, 2H), 3.90 (s, 3H); <sup>13</sup>C NMR (100 MHz, DMSO-*d*<sub>6</sub>):  $\delta$  181.1, 167.2, 166.7, 161.0, 159.3, 145.0, 132.5, 125.0, 114.5, 112.3, 110.5, 108.3, 106.5, 102.3, 97.0, 56.3.

**(Z)-2-(3,4-Dihydroxybenzylidene)-6-methoxybenzofuran-3(2H)-one (1v) [1]**

Compound **1v** was prepared as reported previously [1] employing acid-catalyzed cross-aldol condensation. Yield = 58%.

<sup>1</sup>H NMR (400 MHz, methanol-*d*<sub>4</sub>)  $\delta$  7.68 (dd, *J* = 8.8, 4.4 Hz, 1H), 7.52 (s, 1H), 7.29 (dd, *J* = 8.4, 2.4 Hz, 1H), 6.95 (d, *J* = 2.4 Hz, 1H), 6.86–6.82 (m, 2H), 6.73 (d, *J* = 4.4 Hz, 1H), 3.96 (s, 3H); <sup>13</sup>C NMR (100 MHz, DMSO-*d*<sub>6</sub>)  $\delta$  181.3, 167.4, 166.9 (2C), 148.2, 145.5, 125.2, 124.6, 123.3, 118.2, 116.0, 114.3, 112.5, 112.4, 96.9, 56.3.

**(Z)-6-Methoxy-2-(2-methoxybenzylidene)benzofuran-3(2H)-one (1w) [1]**

Compound **1w** was prepared as reported previously [1] employing acid-catalyzed cross-aldol condensation. Yield = 69%.

<sup>1</sup>H NMR (400 MHz, CDCl<sub>3</sub>)  $\delta$  8.27 (dd, *J* = 8.0, 2.0 Hz, 1H), 7.72 (d, *J* = 8.4 Hz, 1H), 7.40 (s, 1H), 7.38 (td, *J* = 8.0, 2.0 Hz, 1H), 7.07 (t, *J* = 8.0 Hz, 1H), 6.94 (d, *J* = 8.0 Hz, 1H), 6.77–6.73 (m, 2H), 3.92 (s, 3H), 3.90 (s, 3H); <sup>13</sup>C NMR (100 MHz, CDCl<sub>3</sub>)  $\delta$  183.0, 168.4, 167.2, 158.7, 147.9, 131.8, 131.1, 125.8, 121.5, 120.8, 115.1, 112.0, 110.8, 106.1, 96.6, 56.0, 55.6.

**(Z)-6-Methoxy-2-(3-methoxybenzylidene)benzofuran-3(2H)-one (1x) [1]**

Compound **1x** was prepared as reported previously [1] employing acid-catalyzed cross-aldol condensation. Yield = 36%.

<sup>1</sup>H NMR (400 MHz, CDCl<sub>3</sub>)  $\delta$  7.72 (d, *J* = 8.0 Hz, 1H), 7.48–7.46 (m, 2H), 7.38 (t, *J* = 8.0 Hz, 1H), 6.96 (m, *J* =



8.0, 2.0 Hz, 1H), 6.79–6.75 (m, 3H), 3.93 (s, 3H), 3.88 (s, 3H);  $^{13}\text{C}$  NMR (100 MHz,  $\text{CDCl}_3$ )  $\delta$  183.0, 168.6, 167.5, 159.8, 148.0, 133.7, 129.8, 125.9, 124.1, 116.5, 115.4, 114.9, 112.2, 111.7, 96.7, 56.1, 55.4.

## 2. *In vitro* evaluation of antiproliferative mechanisms

**General Experimental Procedures.** General Experimental Procedures. Roswell Park Memorial Institute (RPMI) 1640 medium, Dulbecco Modified Eagle Medium (DMEM) High glucose, Eagle Minimum Essential Medium (EMEM), fetal bovine serum (FBS), antibiotic–antimycotic solution (100 $\times$ ), trypsin–EDTA solution (1 $\times$ ), and phosphate-buffered saline (PBS; 1 $\times$ ) were purchased from HyClone Laboratories, Inc. (South Logan, UT, USA). Laemmli sample buffer (2 $\times$ ) and 2-mercaptomethanol were purchased from Bio-Rad Laboratories, Inc. (Hercules, CA, USA). Dimethyl sulfoxide (DMSO), bicinchoninic acid (BCA), copper(II) sulfate solution, bovine serum albumin (BSA), trichloroacetic acid (TCA), SRB, ribonuclease A (RNase A), and paclitaxel were purchased from Sigma-Aldrich (St. Louis, MO, USA). Anti-Cleaved PARP, anti-Caspas 8, anti-Cleaved Caspas 8, anti-Caspas 9, anti-Cleaved Caspas 9, anti-CDK4, anti-CDK6 and anti-Cdc25C were purchased from Cell Signaling Technology (Danvers, MA, USA). Anti-PARP, anti-Cyclin D1, anti-Cyclin E was purchased from BD Biosciences (Franklin Lakes, NJ, USA). Anti- $\beta$ -actin were purchased from Santa Cruz Technology (Santa Cruz, CA, USA).

**Cell Culture.** HCT116 cells (Human colon cancer), MDA-MB-231 cells (Human breast cancer) and A549 cells (Human lung cancer) were purchased from ATCC (Manassas, VA, USA). HCT116 cells were cultured in RPMI medium, which added with 10% FBS and 1% antibiotics–antimycotics (AA). Cells were Suspended in DMEM medium which added with 10% FBS and 1% antibiotics–antimycotics (AA) (PSF; 100 units/mL penicillin G sodium, 100  $\mu\text{g}/\text{mL}$  streptomycin, and 250 ng/mL amphotericin B). Cells were cultured at 37  $^{\circ}\text{C}$  in 96 well plates under a humidified atmosphere containing 5%  $\text{CO}_2$ .

**Cell Viability Assay.** After 72 h of sample treatment, the cell viability was measured by using the sulforhodamine B (SRB) assay as described previously [4]. Briefly, after incubated with different concentrations of compounds for 72 h, the cells were fixed with 10% trichloroacetic acid (TCA) and stained with SRB solution in 0.1% acetic acids. The stained proteins precipitate was dissolved in 10 mM Tris solution at pH 10 and measured by a Versamax ELISA machine at 515 nm.

**Western blotting.** HCT116 cells ( $1 \times 10^5$  cells/mL in a 60 mm dish) were cultured with the various concentrations of compounds for 24h, 48h. The cells were collected and lysed in 2×sample loading buffer (250 mM Tris-HCl pH 6.8, 4% SDS, 10% glycerol, 0.006% bromophenol blue, 2% β-mercaptoethanol, 50 mM sodium fluoride, and 5 mM sodium orthovanadate). Run the protein samples with the marker on 6–12% SDS-PAGE gel and transferred onto PVDF membranes (Millipore, Bedford, MA, USA). The membranes were blocked with 5% BSA in Tris-buffered saline containing 0.1% Tween-20 (TBST) for 30 min at room temperature, and then incubated with primary antibodies in 2.5% BSA in TBST overnight at 4 °C on a shaker. After the membranes were washed three times with TBST, they were incubated with the secondary antibodies (HRP) (Younginfrontier, Seoul, Korea) diluted in TBST for 2 h at room temperature. And the membranes were further exposed to enhanced chemiluminescence (ECL) solution (Intron, Daejeon, Korea) after washing with TBST. The chemiluminescence signals were measured by using LAS-4000 (Fuji Film Corp., Tokyo, Japan).

**Cell Cycle Analysis.** The above cultured cells were starved in serum-free medium for 8h before the compound sample treatment. After treatment, cells were collected using trypsin, washed with PBS, and fixed with 70% ethanol. The cell lines were dyed with propidium iodide (PI) mixed with RNase, and flow cytometry analysis was performed as described previously [5].

**Annexin V-FITC/PI Staining.** After the cell lines were treated with compounds for 48 h, they were collected, washed with cold PBS, and resuspended in  $1 \times$  binding buffer. Then each set of them were dyed with annexin V-FITC and PI and incubated at ambient temperature for 15 min. the analysis cell apoptosis was performed after Flow cytometry assay.

## References

- [1] A.H.E. Hassan, T.N. Phan, Y. Choi, S. Moon, J.H. No, Y.S. Lee, Design, Rational Repurposing, Synthesis, In Vitro Evaluation, Homology Modeling and In Silico Study of Sulfuretin Analogs as Potential Antileishmanial Hit Compounds, *Pharmaceuticals*, 15 (2022) 1058.
- [2] A.H.E. Hassan, H.J. Kim, M.S. Gee, J.-H. Park, H.R. Jeon, C.J. Lee, Y. Choi, S. Moon, D. Lee, J.K. Lee, K.D. Park, Y.S. Lee, Positional scanning of natural product hispidol's ring-B: discovery of highly selective human monoamine oxidase-B inhibitor analogues downregulating neuroinflammation for management of neurodegenerative diseases, *J. Enzyme Inhib. Med. Chem.*, 37 (2022) 768-780.
- [3] S.Y. Shin, M.C. Shin, J.-S. Shin, K.-T. Lee, Y.S. Lee, Synthesis of aurones and their inhibitory effects on nitric oxide and PGE2 productions in LPS-induced RAW 264.7 cells, *Bioorg. Med. Chem. Lett.*, 21 (2011) 4520-4523.
- [4] W.S. Byun, M. Jin, J. Yu, W.K. Kim, J. Song, H.-J. Chung, L.S. Jeong, S.K. Lee, A novel selenonucleoside suppresses tumor growth by targeting Skp2 degradation in paclitaxel-resistant prostate cancer, *Biochem. Pharmacol.*, 158 (2018) 84-94.

[5] C. Jung, J.-Y. Hong, S.Y. Bae, S.S. Kang, H.J. Park, S.K. Lee, Antitumor Activity of Americanin A Isolated from the Seeds of *Phytolacca americana* by Regulating the ATM/ATR Signaling Pathway and the Skp2–p27 Axis in Human Colon Cancer Cells, *J. Nat. Prod.*, 78 (2015) 2983-2993.

**Table S1.** % Growth inhibition of diverse blood cancer cell lines triggered by 10  $\mu$ M concentrations of sulfuretin and its prepared analogs (**1a–x**).

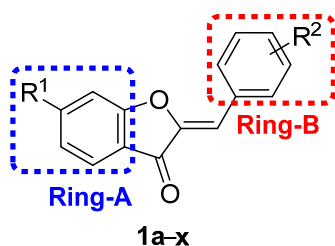

| Comp              | R <sup>1</sup> | R <sup>2</sup>      | CCRFCEM | MOLT4 | HL60(TB) | K562  | RPMI8226 |
|-------------------|----------------|---------------------|---------|-------|----------|-------|----------|
| <b>1a</b>         | 6-Hydroxy      | 2'-Hydroxy          | 0.34    | 4.13  | NI       | 2.64  | NI       |
| <b>1b</b>         | 6-Hydroxy      | 3'-Hydroxy          | 1.34    | NI    | NI       | 5.19  | NI       |
| <b>1c</b>         | 6-Hydroxy      | 4'-Hydroxy          | 3.08    | NI    | NI       | 3.43  | NI       |
| <b>1d</b>         | 6-Hydroxy      | 2',4'-Dihydroxy     | NI      | NI    | NI       | NI    | NI       |
| <b>1e</b>         | 6-Hydroxy      | 2',5'-Dihydroxy     | NI      | NI    | 0.99     | 1.02  | NI       |
| <b>1f</b>         | 6-Hydroxy      | 3',5'-Dihydroxy     | 3.81    | NI    | 5.88     | 10.38 | NI       |
| <b>1g</b>         | 6-Hydroxy      | 3',4',5'-Trihydroxy | NI      | NI    | NI       | 0.65  | NI       |
| <b>1h</b>         | 6-Hydroxy      | 2'-Methoxy          | NI      | NI    | NI       | 1.41  | NI       |
| <b>1i</b>         | 6-Hydroxy      | 3'-Methoxy          | NI      | NI    | 0.53     | 1.15  | NI       |
| <b>1j</b>         | 6-Hydroxy      | 4'-Methoxy          | NI      | NI    | 1.40     | 3.23  | NI       |
| <b>1k</b>         | 6-Hydroxy      | 2',3'-Dimethoxy     | NI      | NI    | 2.89     | 4.56  | NI       |
| <b>1l</b>         | 6-Hydroxy      | 2',5'-Dimethoxy     | 3.86    | NI    | 4.32     | 6.78  | 7.77     |
| <b>1m</b>         | 6-Hydroxy      | 3',4'-Dimethoxy     | 3.92    | 11.07 | 30.69    | 9.71  | 1.05     |
| <b>1n</b>         | 6-Hydroxy      | 3',5'-Dimethoxy     | 26.19   | 15.78 | 54.49    | 30.19 | 12.37    |
| <b>1o</b>         | 6-Hydroxy      | 2',3',4'-Trimethoxy | NI      | 1.92  | 30.27    | 0.77  | 0.35     |
| <b>1p</b>         | 6-Hydroxy      | 4'-Methoxymethoxy   | NI      | 1.12  | 0.76     | 1.71  | NI       |
| <b>1q</b>         | 6-Methoxy      | 2'-Hydroxy          | NI      | 3.36  | 6.14     | 6.88  | NI       |
| <b>1r</b>         | 6-Methoxy      | 3'-Hydroxy          | 4.88    | NI    | 2.22     | 3.50  | 7.88     |
| <b>1s</b>         | 6-Methoxy      | 4'-Hydroxy          | 32.35   | NI    | 9.18     | 10.69 | NI       |
| <b>1t</b>         | 6-Methoxy      | 2',3'-Dihydroxy     | 72.84   | 57.69 | 37.53    | 14.63 | 32.70    |
| <b>1u</b>         | 6-Methoxy      | 2',4'-Dihydroxy     | NI      | NI    | NI       | 0.68  | NI       |
| <b>1v</b>         | 6-Methoxy      | 3',4'-Dihydroxy     | 47.35   | 35.26 | 34.04    | 7.29  | 22.21    |
| <b>1w</b>         | 6-Methoxy      | 2'-Methoxy          | NI      | 0.96  | 8.51     | 13.64 | NI       |
| <b>1x</b>         | 6-Methoxy      | 3'-Methoxy          | NI      | NI    | NI       | NI    | NI       |
| <b>Sulfuretin</b> | 6-Hydroxy      | 3',4'-Dihydroxy     | 17.34   | 11.66 | NI       | 6.33  | 2.04     |

**Table S2.** % Growth inhibition of diverse non-small cell lung cancer cell lines triggered by 10  $\mu$ M concentrations of sulfuretin and its prepared analogs (**1a–x**).

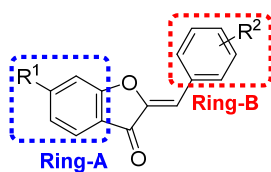

**1a–x**

| Comp              | R <sup>1</sup> | R <sup>2</sup>      | A549  | EKVX  | HOP62 | H23   | H322M | HOP92 | H460  |
|-------------------|----------------|---------------------|-------|-------|-------|-------|-------|-------|-------|
| <b>1a</b>         | 6-Hydroxy      | 2'-Hydroxy          | NI    | 2.51  | NI    | NI    | 2.14  | NI    | NI    |
| <b>1b</b>         | 6-Hydroxy      | 3'-Hydroxy          | NI    | 5.76  | NI    | NI    | 1.06  | 9.70  | NI    |
| <b>1c</b>         | 6-Hydroxy      | 4'-Hydroxy          | 0.70  | NI    | NI    | NI    | 6.56  | NI    | NI    |
| <b>1d</b>         | 6-Hydroxy      | 2',4'-Dihydroxy     | NI    | 2.99  | 0.03  | NI    | NI    | 4.19  | NI    |
| <b>1e</b>         | 6-Hydroxy      | 2',5'-Dihydroxy     | NI    | 3.27  | NI    | NI    | NI    | NI    | NI    |
| <b>1f</b>         | 6-Hydroxy      | 3',5'-Dihydroxy     | NI    |
| <b>1g</b>         | 6-Hydroxy      | 3',4',5'-Trihydroxy | 0.35  | 4.54  | NI    | NI    | NI    | NI    | NI    |
| <b>1h</b>         | 6-Hydroxy      | 2'-Methoxy          | NI    | 4.15  | NI    | NI    | NI    | NI    | NI    |
| <b>1i</b>         | 6-Hydroxy      | 3'-Methoxy          | 5.92  | 7.66  | 1.44  | 1.30  | NI    | NI    | NI    |
| <b>1j</b>         | 6-Hydroxy      | 4'-Methoxy          | 0.07  | 6.51  | NI    | NI    | NI    | NI    | NI    |
| <b>1k</b>         | 6-Hydroxy      | 2',3'-Dimethoxy     | NI    | 0.61  | NI    | NI    | NI    | NI    | NI    |
| <b>1l</b>         | 6-Hydroxy      | 2',5'-Dimethoxy     | 1.23  | 8.62  | NI    | 3.91  | 7.43  | 1.80  | 8.36  |
| <b>1m</b>         | 6-Hydroxy      | 3',4'-Dimethoxy     | NI    |
| <b>1n</b>         | 6-Hydroxy      | 3',5'-Dimethoxy     | 27.03 | 8.86  | 4.18  | 9.81  | 29.10 | 2.70  | 37.75 |
| <b>1o</b>         | 6-Hydroxy      | 2',3',4'-Trimethoxy | NI    |
| <b>1p</b>         | 6-Hydroxy      | 4'-Methoxymethoxy   | NI    | 4.42  | NI    | 2.46  | 4.35  | NI    | NI    |
| <b>1q</b>         | 6-Methoxy      | 2'-Hydroxy          | NI    | 3.96  | 3.92  | 7.64  | 2.05  | 7.15  | NI    |
| <b>1r</b>         | 6-Methoxy      | 3'-Hydroxy          | NI    | 7.71  | 2.41  | 2.32  | 4.52  | 5.90  | NI    |
| <b>1s</b>         | 6-Methoxy      | 4'-Hydroxy          | 6.55  | 4.62  | NI    | 0.06  | 5.50  | NI    | 0.21  |
| <b>1t</b>         | 6-Methoxy      | 2',3'-Dihydroxy     | 33.72 | 17.87 | 10.96 | 29.89 | 27.62 | 4.63  | 38.23 |
| <b>1u</b>         | 6-Methoxy      | 2',4'-Dihydroxy     | 2.89  | NI    | NI    | NI    | 9.05  | NI    | NI    |
| <b>1v</b>         | 6-Methoxy      | 3',4'-Dihydroxy     | 8.48  | NI    | NI    | NI    | 10.51 | NI    | 5.90  |
| <b>1w</b>         | 6-Methoxy      | 2'-Methoxy          | 8.95  | NI    | NI    | NI    | 4.57  | 8.80  | NI    |
| <b>1x</b>         | 6-Methoxy      | 3'-Methoxy          | NI    |
| <b>Sulfuretin</b> | 6-Hydroxy      | 3',4'-Dihydroxy     | NI    | NI    | NI    | NI    | 0.93  | NI    | NI    |

**Table S3.** % Growth inhibition of diverse colorectal cancer cell lines triggered by 10  $\mu$ M concentrations of sulfuretin and its prepared analogs (**1a–x**).

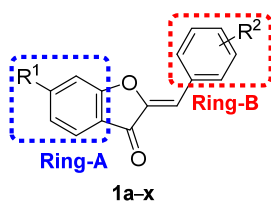

| Comp              | R <sup>1</sup> | R <sup>2</sup>      | HCC2998 | HCT116 | HCT15 | KM12  | SW620 |
|-------------------|----------------|---------------------|---------|--------|-------|-------|-------|
| <b>1a</b>         | 6-Hydroxy      | 2'-Hydroxy          | NI      | NI     | NI    | NI    | NI    |
| <b>1b</b>         | 6-Hydroxy      | 3'-Hydroxy          | NI      | NI     | 7.28  | NI    | NI    |
| <b>1c</b>         | 6-Hydroxy      | 4'-Hydroxy          | NI      | NI     | 6.80  | NI    | NI    |
| <b>1d</b>         | 6-Hydroxy      | 2',4'-Dihydroxy     | NI      | NI     | NI    | NI    | NI    |
| <b>1e</b>         | 6-Hydroxy      | 2',5'-Dihydroxy     | NI      | 3.67   | NI    | NI    | NI    |
| <b>1f</b>         | 6-Hydroxy      | 3',5'-Dihydroxy     | NI      | 15.40  | NI    | NI    | NI    |
| <b>1g</b>         | 6-Hydroxy      | 3',4',5'-Trihydroxy | NI      | 16.80  | NI    | NI    | NI    |
| <b>1h</b>         | 6-Hydroxy      | 2'-Methoxy          | NI      | NI     | 1.10  | NI    | NI    |
| <b>1i</b>         | 6-Hydroxy      | 3'-Methoxy          | NI      | 1.04   | 6.73  | NI    | NI    |
| <b>1j</b>         | 6-Hydroxy      | 4'-Methoxy          | NI      | 15.48  | 0.83  | NI    | NI    |
| <b>1k</b>         | 6-Hydroxy      | 2',3'-Dimethoxy     | NI      | 0.76   | NI    | NI    | NI    |
| <b>1l</b>         | 6-Hydroxy      | 2',5'-Dimethoxy     | 0.70    | 20.85  | 24.96 | NI    | 7.80  |
| <b>1m</b>         | 6-Hydroxy      | 3',4'-Dimethoxy     | NI      | NI     | NI    | 3.15  | NI    |
| <b>1n</b>         | 6-Hydroxy      | 3',5'-Dimethoxy     | NI      | 40.81  | 51.76 | 6.80  | 25.32 |
| <b>1o</b>         | 6-Hydroxy      | 2',3',4'-Trimethoxy | NI      | NI     | NI    | NI    | NI    |
| <b>1p</b>         | 6-Hydroxy      | 4'-Methoxymethoxy   | NI      | NI     | 1.66  | NI    | NI    |
| <b>1q</b>         | 6-Methoxy      | 2'-Hydroxy          | NI      | 6.96   | 0.36  | NI    | NI    |
| <b>1r</b>         | 6-Methoxy      | 3'-Hydroxy          | NI      | 1.35   | 5.01  | NI    | 2.27  |
| <b>1s</b>         | 6-Methoxy      | 4'-Hydroxy          | 0.55    | NI     | 3.12  | NI    | NI    |
| <b>1t</b>         | 6-Methoxy      | 2',3'-Dihydroxy     | 21.28   | 45.53  | 69.49 | 33.70 | 39.95 |
| <b>1u</b>         | 6-Methoxy      | 2',4'-Dihydroxy     | NI      | 2.93   | 4.59  | 9.47  | NI    |
| <b>1v</b>         | 6-Methoxy      | 3',4'-Dihydroxy     | NI      | 11.03  | 24.00 | 22.08 | 4.78  |
| <b>1w</b>         | 6-Methoxy      | 2'-Methoxy          | NI      | 9.66   | 8.51  | 13.52 | 10.61 |
| <b>1x</b>         | 6-Methoxy      | 3'-Methoxy          | NI      | NI     | 0.22  | NI    | NI    |
| <b>Sulfuretin</b> | 6-Hydroxy      | 3',4'-Dihydroxy     | NI      | NI     | 10.67 | 9.49  | NI    |

**Table S4.** % Growth inhibition of diverse brain cancer cell lines triggered by 10  $\mu$ M concentrations of sulfuretin and its prepared analogs (**1a–x**).

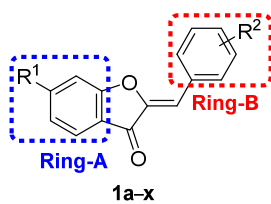

| Comp              | R <sup>1</sup> | R <sup>2</sup>      | SF268 | SNB75 | SF295 | SF539 | SNB19 | U251  |
|-------------------|----------------|---------------------|-------|-------|-------|-------|-------|-------|
| <b>1a</b>         | 6-Hydroxy      | 2'-Hydroxy          | NI    | 15.81 | 3.54  | NI    | 2.81  | NI    |
| <b>1b</b>         | 6-Hydroxy      | 3'-Hydroxy          | NI    | 24.83 | 5.38  | 4.56  | 3.50  | NI    |
| <b>1c</b>         | 6-Hydroxy      | 4'-Hydroxy          | NI    | 15.49 | 1.53  | 11.94 | 12.88 | 3.02  |
| <b>1d</b>         | 6-Hydroxy      | 2',4'-Dihydroxy     | NI    | 1.32  | NI    | NI    | NI    | NI    |
| <b>1e</b>         | 6-Hydroxy      | 2',5'-Dihydroxy     | NI    | NI    | NI    | NI    | NI    | NI    |
| <b>1f</b>         | 6-Hydroxy      | 3',5'-Dihydroxy     | 3.63  | 1.99  | NI    | NI    | NI    | 1.71  |
| <b>1g</b>         | 6-Hydroxy      | 3',4',5'-Trihydroxy | NI    | 1.20  | NI    | NI    | NI    | NI    |
| <b>1h</b>         | 6-Hydroxy      | 2'-Methoxy          | NI    | NI    | NI    | NI    | NI    | NI    |
| <b>1i</b>         | 6-Hydroxy      | 3'-Methoxy          | 0.75  | NI    | 1.02  | NI    | NI    | 5.99  |
| <b>1j</b>         | 6-Hydroxy      | 4'-Methoxy          | NI    | NI    | 1.62  | 2.33  | 1.24  | 3.16  |
| <b>1k</b>         | 6-Hydroxy      | 2',3'-Dimethoxy     | NI    | NI    | NI    | NI    | NI    | NI    |
| <b>1l</b>         | 6-Hydroxy      | 2',5'-Dimethoxy     | 12.68 | 11.38 | 1.43  | 4.57  | 4.47  | 10.54 |
| <b>1m</b>         | 6-Hydroxy      | 3',4'-Dimethoxy     | 11.64 | 13.83 | 1.67  | 3.87  | 9.83  | 2.40  |
| <b>1n</b>         | 6-Hydroxy      | 3',5'-Dimethoxy     | 30.13 | 45.46 | 10.11 | 16.36 | 11.29 | 35.13 |
| <b>1o</b>         | 6-Hydroxy      | 2',3',4'-Trimethoxy | NI    | NI    | NI    | NI    | 4.52  | NI    |
| <b>1p</b>         | 6-Hydroxy      | 4'-Methoxymethoxy   | 2.23  | 7.33  | 7.70  | NI    | 19.12 | 14.28 |
| <b>1q</b>         | 6-Methoxy      | 2'-Hydroxy          | 3.91  | 0.43  | NI    | NI    | 5.45  | NI    |
| <b>1r</b>         | 6-Methoxy      | 3'-Hydroxy          | 4.36  | 8.09  | 1.95  | 4.93  | 2.87  | 0.84  |
| <b>1s</b>         | 6-Methoxy      | 4'-Hydroxy          | 12.38 | 15.19 | NI    | 7.49  | 5.00  | 6.65  |
| <b>1t</b>         | 6-Methoxy      | 2',3'-Dihydroxy     | 47.38 | 37.49 | 6.23  | 41.46 | 15.10 | 39.65 |
| <b>1u</b>         | 6-Methoxy      | 2',4'-Dihydroxy     | 10.53 | 16.25 | NI    | NI    | 4.53  | 3.01  |
| <b>1v</b>         | 6-Methoxy      | 3',4'-Dihydroxy     | 30.38 | 29.82 | NI    | 20.95 | 8.36  | 16.06 |
| <b>1w</b>         | 6-Methoxy      | 2'-Methoxy          | 7.56  | 17.41 | 6.27  | 2.43  | 0.84  | 17.67 |
| <b>1x</b>         | 6-Methoxy      | 3'-Methoxy          | 4.80  | 15.83 | 2.88  | NI    | 0.30  | NI    |
| <b>Sulfuretin</b> | 6-Hydroxy      | 3',4'-Dihydroxy     | 5.36  | 19.89 | NI    | 21.03 | 5.68  | 4.36  |

**Table S5.** % Growth inhibition of diverse melanoma cancer cell lines triggered by 10  $\mu$ M concentrations of sulfuretin and its prepared analogs (**1a–x**).



| Comp              | R <sup>1</sup> | R <sup>2</sup>      | LOXIMVI | M14   | MDAMB435 | MALME3M | SKMEL28 | SKMEL5 | UACC257 | UACC62 |
|-------------------|----------------|---------------------|---------|-------|----------|---------|---------|--------|---------|--------|
| <b>1a</b>         | 6-Hydroxy      | 2'-Hydroxy          | NI      | NI    | NI       | NI      | NI      | 1.25   | NI      | 5.05   |
| <b>1b</b>         | 6-Hydroxy      | 3'-Hydroxy          | NI      | NI    | NI       | 3.19    | NI      | 5.14   | NI      | 3.09   |
| <b>1c</b>         | 6-Hydroxy      | 4'-Hydroxy          | NI      | NI    | 1.98     | NI      | NI      | 0.62   | NI      | 6.68   |
| <b>1d</b>         | 6-Hydroxy      | 2',4'-Dihydroxy     | NI      | NI    | NI       | 3.51    | NI      | 0.93   | 0.00    | 0.65   |
| <b>1e</b>         | 6-Hydroxy      | 2',5'-Dihydroxy     | 4.67    | NI    | 0.90     | NI      | NI      | 2.47   | NI      | NI     |
| <b>1f</b>         | 6-Hydroxy      | 3',5'-Dihydroxy     | 6.28    | 6.94  | NI       | 6.27    | NI      | 1.66   | NI      | NI     |
| <b>1g</b>         | 6-Hydroxy      | 3',4',5'-Trihydroxy | 10.36   | 4.35  | NI       | NI      | NI      | 3.91   | NI      | NI     |
| <b>1h</b>         | 6-Hydroxy      | 2'-Methoxy          | NI      | NI    | 0.11     | 5.85    | NI      | 1.62   | NI      | NI     |
| <b>1i</b>         | 6-Hydroxy      | 3'-Methoxy          | 4.26    | 4.25  | 4.70     | 5.34    | NI      | 0.52   | NI      | NI     |
| <b>1j</b>         | 6-Hydroxy      | 4'-Methoxy          | NI      | 12.89 | 1.64     | 5.96    | NI      | 0.31   | NI      | 0.84   |
| <b>1k</b>         | 6-Hydroxy      | 2',3'-Dimethoxy     | NI      | 5.56  | NI       | 5.19    | NI      | 2.41   | NI      | NI     |
| <b>1l</b>         | 6-Hydroxy      | 2',5'-Dimethoxy     | 11.44   | 26.80 | 17.29    | 23.96   | 11.49   | 7.61   | NI      | 11.00  |
| <b>1m</b>         | 6-Hydroxy      | 3',4'-Dimethoxy     | NI      | NI    | 2.36     | NI      | NI      | 3.20   | NI      | 1.84   |
| <b>1n</b>         | 6-Hydroxy      | 3',5'-Dimethoxy     | 37.54   | 46.55 | 26.59    | 36.44   | 13.35   | 26.94  | 20.47   | 30.02  |
| <b>1o</b>         | 6-Hydroxy      | 2',3',4'-Trimethoxy | NI      | NI    | 2.43     | 3.63    | NI      | 5.81   | NI      | NI     |
| <b>1p</b>         | 6-Hydroxy      | 4'-Methoxymethoxy   | NI      | NI    | NI       | 2.55    | 15.00   | 8.18   | NI      | 9.37   |
| <b>1q</b>         | 6-Methoxy      | 2'-Hydroxy          | 2.15    | 3.96  | NI       | 4.22    | NI      | 1.18   | NI      | 6.57   |
| <b>1r</b>         | 6-Methoxy      | 3'-Hydroxy          | 2.35    | NI    | 1.66     | NI      | NI      | 0.32   | NI      | 7.73   |
| <b>1s</b>         | 6-Methoxy      | 4'-Hydroxy          | 4.35    | NI    | 12.63    | 2.65    | NI      | NI     | 1.83    | 0.66   |
| <b>1t</b>         | 6-Methoxy      | 2',3'-Dihydroxy     | 53.65   | 9.56  | 25.87    | 25.35   | 17.81   | 28.60  | 0.23    | 27.84  |
| <b>1u</b>         | 6-Methoxy      | 2',4'-Dihydroxy     | NI      | 3.53  | 29.88    | 7.72    | NI      | NI     | NI      | 6.57   |
| <b>1v</b>         | 6-Methoxy      | 3',4'-Dihydroxy     | 12.50   | NI    | 8.54     | 4.17    | 4.00    | 0.36   | NI      | 7.38   |
| <b>1w</b>         | 6-Methoxy      | 2'-Methoxy          | NI      | 4.48  | 27.82    | 8.71    | 0.45    | 3.19   | 3.82    | 15.46  |
| <b>1x</b>         | 6-Methoxy      | 3'-Methoxy          | NI      | NI    | 3.09     | NI      | 0.46    | NI     | NI      | 8.83   |
| <b>Sulfuretin</b> | 6-Hydroxy      | 3',4'-Dihydroxy     | NI      | NI    | 4.57     | NI      | NI      | 7.52   | NI      | 5.21   |



**Table S6.** % Growth inhibition of diverse ovarian cancer cell lines triggered by 10  $\mu$ M concentrations of sulfuretin and its prepared analogs (**1a–x**).

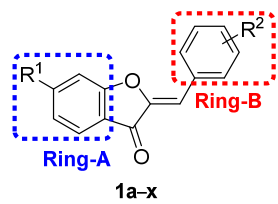

| Comp              | R <sup>1</sup> | R <sup>2</sup>      | IGROV1 | OVCAR3 | OVCAR4 | OVCAR5 | OVCAR8 | ADRRES |
|-------------------|----------------|---------------------|--------|--------|--------|--------|--------|--------|
| <b>1a</b>         | 6-Hydroxy      | 2'-Hydoxy           | NI     | NI     | NI     | NI     | NI     | NI     |
| <b>1b</b>         | 6-Hydroxy      | 3'-Hydoxy           | NI     | NI     | 1.81   | NI     | NI     | NI     |
| <b>1c</b>         | 6-Hydroxy      | 4'-Hydoxy           | NI     | NI     | NI     | NI     | NI     | NI     |
| <b>1d</b>         | 6-Hydroxy      | 2',4'-Dihydroxy     | NI     | NI     | NI     | NI     | NI     | NI     |
| <b>1e</b>         | 6-Hydroxy      | 2',5'-Dihydroxy     | NI     | NI     | NI     | NI     | NI     | NI     |
| <b>1f</b>         | 6-Hydroxy      | 3',5'-Dihydroxy     | NI     | NI     | NI     | NI     | 1.12   | NI     |
| <b>1g</b>         | 6-Hydroxy      | 3',4',5'-Trihydroxy | NI     | NI     | NI     | NI     | NI     | NI     |
| <b>1h</b>         | 6-Hydroxy      | 2'-Methoxy          | NI     | NI     | NI     | NI     | NI     | NI     |
| <b>1i</b>         | 6-Hydroxy      | 3'-Methoxy          | 2.99   | NI     | 6.04   | NI     | NI     | 1.15   |
| <b>1j</b>         | 6-Hydroxy      | 4'-Methoxy          | NI     | NI     | NI     | NI     | NI     | -6.12  |
| <b>1k</b>         | 6-Hydroxy      | 2',3'-Dimethoxy     | NI     | NI     | NI     | NI     | NI     | NI     |
| <b>1l</b>         | 6-Hydroxy      | 2',5'-Dimethoxy     | 10.73  | 4.23   | 13.31  | NI     | 14.42  | 7.10   |
| <b>1m</b>         | 6-Hydroxy      | 3',4'-Dimethoxy     | NI     | NI     | NI     | NI     | 2.79   | NI     |
| <b>1n</b>         | 6-Hydroxy      | 3',5'-Dimethoxy     | 43.54  | 19.41  | 28.79  | 5.35   | 25.20  | 6.80   |
| <b>1o</b>         | 6-Hydroxy      | 2',3',4'-Trimethoxy | NI     | NI     | NI     | NI     | NI     | NI     |
| <b>1p</b>         | 6-Hydroxy      | 4'-Methoxymethoxy   | 0.72   | NI     | NI     | NI     | NI     | 1.50   |
| <b>1q</b>         | 6-Methoxy      | 2'-Hydoxy           | NI     | NI     | 11.58  | NI     | 1.34   | 3.75   |
| <b>1r</b>         | 6-Methoxy      | 3'-Hydoxy           | 2.45   | NI     | 14.94  | NI     | 3.53   | NI     |
| <b>1s</b>         | 6-Methoxy      | 4'-Hydoxy           | 0.27   | NI     | 5.24   | NI     | 8.97   | NI     |
| <b>1t</b>         | 6-Methoxy      | 2',3'-Dihydroxy     | 62.54  | 76.89  | 46.14  | 21.03  | 27.81  | 39.87  |
| <b>1u</b>         | 6-Methoxy      | 2',4'-Dihydroxy     | 8.62   | 7.99   | 0.82   | NI     | 0.73   | 1.54   |
| <b>1v</b>         | 6-Methoxy      | 3',4'-Dihydroxy     | 23.35  | 16.75  | 18.63  | 5.13   | 3.57   | 5.72   |
| <b>1w</b>         | 6-Methoxy      | 2'-Methoxy          | 4.40   | 3.12   | 4.53   | 3.20   | 1.78   | NI     |
| <b>1x</b>         | 6-Methoxy      | 3'-Methoxy          | NI     | NI     | 4.65   | NI     | NI     | 0.79   |
| <b>Sulfuretin</b> | 6-Hydroxy      | 3',4'-Dihydroxy     | NI     | 0.96   | 4.46   | NI     | NI     | NI     |

**Table S7.** % Growth inhibition of diverse renal cancer cell lines triggered by 10  $\mu$ M concentrations of sulfuretin and its prepared analogs (**1a–x**).



| Comp              | R <sup>1</sup> | R <sup>2</sup>      | 786O  | CAKI1 | ACHN  | RXF393 | SN12C | UO31  |
|-------------------|----------------|---------------------|-------|-------|-------|--------|-------|-------|
| <b>1a</b>         | 6-Hydroxy      | 2'-Hydroxy          | 6.35  | 4.77  | NI    | NI     | NI    | NI    |
| <b>1b</b>         | 6-Hydroxy      | 3'-Hydroxy          | 18.19 | 4.38  | NI    | NI     | 1.16  | NI    |
| <b>1c</b>         | 6-Hydroxy      | 4'-Hydroxy          | 9.49  | NI    | NI    | NI     | 3.56  | NI    |
| <b>1d</b>         | 6-Hydroxy      | 2',4'-Dihydroxy     | 3.42  | 3.75  | 1.79  | NI     | 1.01  | 13.36 |
| <b>1e</b>         | 6-Hydroxy      | 2',5'-Dihydroxy     | 0.31  | 0.59  | NI    | NI     | NI    | 1.35  |
| <b>1f</b>         | 6-Hydroxy      | 3',5'-Dihydroxy     | 0.28  | 0.99  | NI    | NI     | 0.53  | 3.98  |
| <b>1g</b>         | 6-Hydroxy      | 3',4',5'-Trihydroxy | 0.93  | NI    | NI    | NI     | NI    | 7.89  |
| <b>1h</b>         | 6-Hydroxy      | 2'-Methoxy          | 0.02  | 5.72  | NI    | NI     | 1.80  | 10.71 |
| <b>1i</b>         | 6-Hydroxy      | 3'-Methoxy          | 12.66 | 23.69 | NI    | NI     | NI    | 18.70 |
| <b>1j</b>         | 6-Hydroxy      | 4'-Methoxy          | 3.59  | 9.11  | NI    | NI     | NI    | 14.45 |
| <b>1k</b>         | 6-Hydroxy      | 2',3'-Dimethoxy     | NI    | NI    | NI    | NI     | NI    | 4.43  |
| <b>1l</b>         | 6-Hydroxy      | 2',5'-Dimethoxy     | 10.54 | 6.33  | 31.67 | 19.47  | 14.21 | 39.71 |
| <b>1m</b>         | 6-Hydroxy      | 3',4'-Dimethoxy     | NI    | 12.69 | NI    | NI     | 5.60  | 8.55  |
| <b>1n</b>         | 6-Hydroxy      | 3',5'-Dimethoxy     | 23.64 | 65.63 | 45.39 | 38.87  | 23.38 | 53.08 |
| <b>1o</b>         | 6-Hydroxy      | 2',3',4'-Trimethoxy | NI    | 3.71  | NI    | NI     | NI    | 11.33 |
| <b>1p</b>         | 6-Hydroxy      | 4'-Methoxymethoxy   | 10.90 | 1.41  | NI    | NI     | 11.54 | 0.32  |
| <b>1q</b>         | 6-Methoxy      | 2'-Hydroxy          | 11.33 | 1.80  | NI    | NI     | 5.74  | 21.90 |
| <b>1r</b>         | 6-Methoxy      | 3'-Hydroxy          | 5.73  | 7.23  | NI    | NI     | 3.58  | 21.38 |
| <b>1s</b>         | 6-Methoxy      | 4'-Hydroxy          | 8.21  | 9.26  | NI    | NI     | 2.02  | 23.43 |
| <b>1t</b>         | 6-Methoxy      | 2',3'-Dihydroxy     | 19.63 | 56.79 | 33.79 | 27.15  | 42.29 | 69.47 |
| <b>1u</b>         | 6-Methoxy      | 2',4'-Dihydroxy     | 5.14  | 5.78  | NI    | NI     | 6.70  | 11.41 |
| <b>1v</b>         | 6-Methoxy      | 3',4'-Dihydroxy     | 1.07  | 27.20 | NI    | NI     | 22.35 | 50.03 |
| <b>1w</b>         | 6-Methoxy      | 2'-Methoxy          | 10.71 | 17.04 | 3.39  | NI     | 5.58  | 13.05 |
| <b>1x</b>         | 6-Methoxy      | 3'-Methoxy          | 8.72  | 9.79  | NI    | NI     | 0.09  | 0.98  |
| <b>Sulfuretin</b> | 6-Hydroxy      | 3',4'-Dihydroxy     | 6.04  | 3.30  | NI    | NI     | 8.36  | 6.56  |

**Table S8.** % Growth inhibition of diverse prostate cancer cell lines triggered by 10  $\mu$ M concentrations of sulfuretin and its prepared analogs (**1a–x**).



| Comp              | R <sup>1</sup> | R <sup>2</sup>      | PC3   | DU145 |
|-------------------|----------------|---------------------|-------|-------|
| <b>1a</b>         | 6-Hydroxy      | 2'-Hydroxy          | NI    | NI    |
| <b>1b</b>         | 6-Hydroxy      | 3'-Hydroxy          | NI    | NI    |
| <b>1c</b>         | 6-Hydroxy      | 4'-Hydroxy          | NI    | NI    |
| <b>1d</b>         | 6-Hydroxy      | 2',4'-Dihydroxy     | 1.60  | NI    |
| <b>1e</b>         | 6-Hydroxy      | 2',5'-Dihydroxy     | NI    | NI    |
| <b>1f</b>         | 6-Hydroxy      | 3',5'-Dihydroxy     | 0.38  | NI    |
| <b>1g</b>         | 6-Hydroxy      | 3',4',5'-Trihydroxy | 3.49  | NI    |
| <b>1h</b>         | 6-Hydroxy      | 2'-Methoxy          | NI    | NI    |
| <b>1i</b>         | 6-Hydroxy      | 3'-Methoxy          | NI    | 6.41  |
| <b>1j</b>         | 6-Hydroxy      | 4'-Methoxy          | NI    | NI    |
| <b>1k</b>         | 6-Hydroxy      | 2',3'-Dimethoxy     | NI    | NI    |
| <b>1l</b>         | 6-Hydroxy      | 2',5'-Dimethoxy     | 4.50  | 22.55 |
| <b>1m</b>         | 6-Hydroxy      | 3',4'-Dimethoxy     | 0.51  | NI    |
| <b>1n</b>         | 6-Hydroxy      | 3',5'-Dimethoxy     | 9.19  | 37.22 |
| <b>1o</b>         | 6-Hydroxy      | 2',3',4'-Trimethoxy | NI    | NI    |
| <b>1p</b>         | 6-Hydroxy      | 4'-Methoxymethoxy   | 1.55  | NI    |
| <b>1q</b>         | 6-Methoxy      | 2'-Hydroxy          | NI    | NI    |
| <b>1r</b>         | 6-Methoxy      | 3'-Hydroxy          | NI    | NI    |
| <b>1s</b>         | 6-Methoxy      | 4'-Hydroxy          | NI    | NI    |
| <b>1t</b>         | 6-Methoxy      | 2',3'-Dihydroxy     | 10.05 | 32.09 |
| <b>1u</b>         | 6-Methoxy      | 2',4'-Dihydroxy     | NI    | NI    |
| <b>1v</b>         | 6-Methoxy      | 3',4'-Dihydroxy     | 5.56  | 7.73  |
| <b>1w</b>         | 6-Methoxy      | 2'-Methoxy          | 0.44  | 1.50  |
| <b>1x</b>         | 6-Methoxy      | 3'-Methoxy          | NI    | NI    |
| <b>Sulfuretin</b> | 6-Hydroxy      | 3',4'-Dihydroxy     | NI    | NI    |

**Table S9.** % Growth inhibition of diverse breast cancer cell lines triggered by 10  $\mu$ M concentrations of sulfuretin and its prepared analogs (**1a–x**).



| Comp              | R <sup>1</sup> | R <sup>2</sup>      | MCF7  | BT549 | MDAMB231 | MDAMB468 |
|-------------------|----------------|---------------------|-------|-------|----------|----------|
| <b>1a</b>         | 6-Hydroxy      | 2'-Hydroxy          | NI    | NI    | NI       | NI       |
| <b>1b</b>         | 6-Hydroxy      | 3'-Hydroxy          | NI    | NI    | NI       | NI       |
| <b>1c</b>         | 6-Hydroxy      | 4'-Hydroxy          | NI    | NI    | NI       | 1.05     |
| <b>1d</b>         | 6-Hydroxy      | 2',4'-Dihydroxy     | NI    | NI    | NI       | 1.93     |
| <b>1e</b>         | 6-Hydroxy      | 2',5'-Dihydroxy     | NI    | NI    | NI       | NI       |
| <b>1f</b>         | 6-Hydroxy      | 3',5'-Dihydroxy     | NI    | NI    | NI       | NI       |
| <b>1g</b>         | 6-Hydroxy      | 3',4',5'-Trihydroxy | 2.60  | 5.91  | NI       | NI       |
| <b>1h</b>         | 6-Hydroxy      | 2'-Methoxy          | 0.99  | NI    | NI       | NI       |
| <b>1i</b>         | 6-Hydroxy      | 3'-Methoxy          | NI    | 20.43 | NI       | NI       |
| <b>1j</b>         | 6-Hydroxy      | 4'-Methoxy          | NI    | 7.25  | NI       | NI       |
| <b>1k</b>         | 6-Hydroxy      | 2',3'-Dimethoxy     | NI    | NI    | 6.87     | NI       |
| <b>1l</b>         | 6-Hydroxy      | 2',5'-Dimethoxy     | 5.77  | 20.23 | NI       | NI       |
| <b>1m</b>         | 6-Hydroxy      | 3',4'-Dimethoxy     | NI    | NI    | NI       | NI       |
| <b>1n</b>         | 6-Hydroxy      | 3',5'-Dimethoxy     | 22.80 | 45.64 | 7.24     | 13.57    |
| <b>1o</b>         | 6-Hydroxy      | 2',3',4'-Trimethoxy | NI    | NI    | NI       | NI       |
| <b>1p</b>         | 6-Hydroxy      | 4'-Methoxymethoxy   | NI    | NI    | 1.70     | NI       |
| <b>1q</b>         | 6-Methoxy      | 2'-Hydroxy          | 17.10 | 9.74  | 2.51     | NI       |
| <b>1r</b>         | 6-Methoxy      | 3'-Hydroxy          | 26.79 | 4.51  | 3.89     | 0.43     |
| <b>1s</b>         | 6-Methoxy      | 4'-Hydroxy          | NI    | 21.09 | NI       | NI       |
| <b>1t</b>         | 6-Methoxy      | 2',3'-Dihydroxy     | 48.96 | 37.85 | 37.51    | 19.42    |
| <b>1u</b>         | 6-Methoxy      | 2',4'-Dihydroxy     | NI    | 7.28  | NI       | 3.77     |
| <b>1v</b>         | 6-Methoxy      | 3',4'-Dihydroxy     | NI    | 16.70 | 16.52    | 5.96     |
| <b>1w</b>         | 6-Methoxy      | 2'-Methoxy          | 6.52  | 9.03  | NI       | 24.09    |
| <b>1x</b>         | 6-Methoxy      | 3'-Methoxy          | NI    | NI    | NI       | 1.90     |
| <b>Sulfuretin</b> | 6-Hydroxy      | 3',4'-Dihydroxy     | NI    | NI    | 3.89     | 1.16     |
